# Supplementary material for: Cationic Surfactant-Modified Tetraselmis sp. for the Removal of Organic Dyes from Aqueous Solution
Source: MDPI journal article supplement (doi:10.3390/molecules28237839), 2023-11-29
Supplement: s1 [file s1]

***Supplementary material for:***

# **Cationic Surfactant-Modified *Tetraselmis* sp. for the Removal of Organic Dyes from Aqueous Solution**

**Buhani <sup>1</sup>, Istikomah <sup>1</sup>, Suharso <sup>1</sup>, Sumadi <sup>2</sup>, Sutarto <sup>3</sup>, Huda M. Alghamdi <sup>4</sup> and Khalid Z. Elwakeel <sup>4,5,\*</sup>**

<sup>1</sup> Department of Chemistry, Faculty of Mathematic and Natural Sciences, University of Lampung, Jl. Soemantri Brojonegoro No. 1, Bandar Lampung 35145, Indonesia; buhani@fmipa.unila.ac.id (B.); isti9515@gmail.com (I.); suharso@fmipa.unila.ac.id (S.)

<sup>2</sup> Department of Electrical Engineering, Faculty of Engineering, University of Lampung, Jl. Soemantri Brojonegoro No. 1, Bandar Lampung 35145, Indonesia; sumadi.1973@eng.unila.ac.id

<sup>3</sup> Department of Medicine, Faculty of Medicine, University of Lampung, Bandar Lampung 35141, Indonesia

<sup>4</sup> Department of Chemistry, College of Science, University of Jeddah, Jeddah 80327, Saudi Arabia; halghamdi3@uj.edu.sa

<sup>5</sup> Environmental Chemistry Division, Environmental Science Department, Faculty of Science, Port Said University, Port Said 42522, Egypt

\* Correspondence: kelwkeel@uj.edu.sa

**Table S1:** Chemical Properties and Characteristics of MO and MB

| Generic name                                        | Methyl orange                                              | Methylene blue                                   |
|-----------------------------------------------------|------------------------------------------------------------|--------------------------------------------------|
| Chemical formula                                    | $\text{C}_{14}\text{H}_{14}\text{N}_3\text{NaO}_3\text{S}$ | $\text{C}_{16}\text{H}_{18}\text{ClN}_3\text{S}$ |
| Molecular weight ( $\text{g}\cdot\text{mol}^{-1}$ ) | 327.33                                                     | 319.85                                           |
| Type of dye                                         | Anionic                                                    | Cationic                                         |
| $\lambda_{\text{max}}$ (nm)                         | 465                                                        | 664                                              |

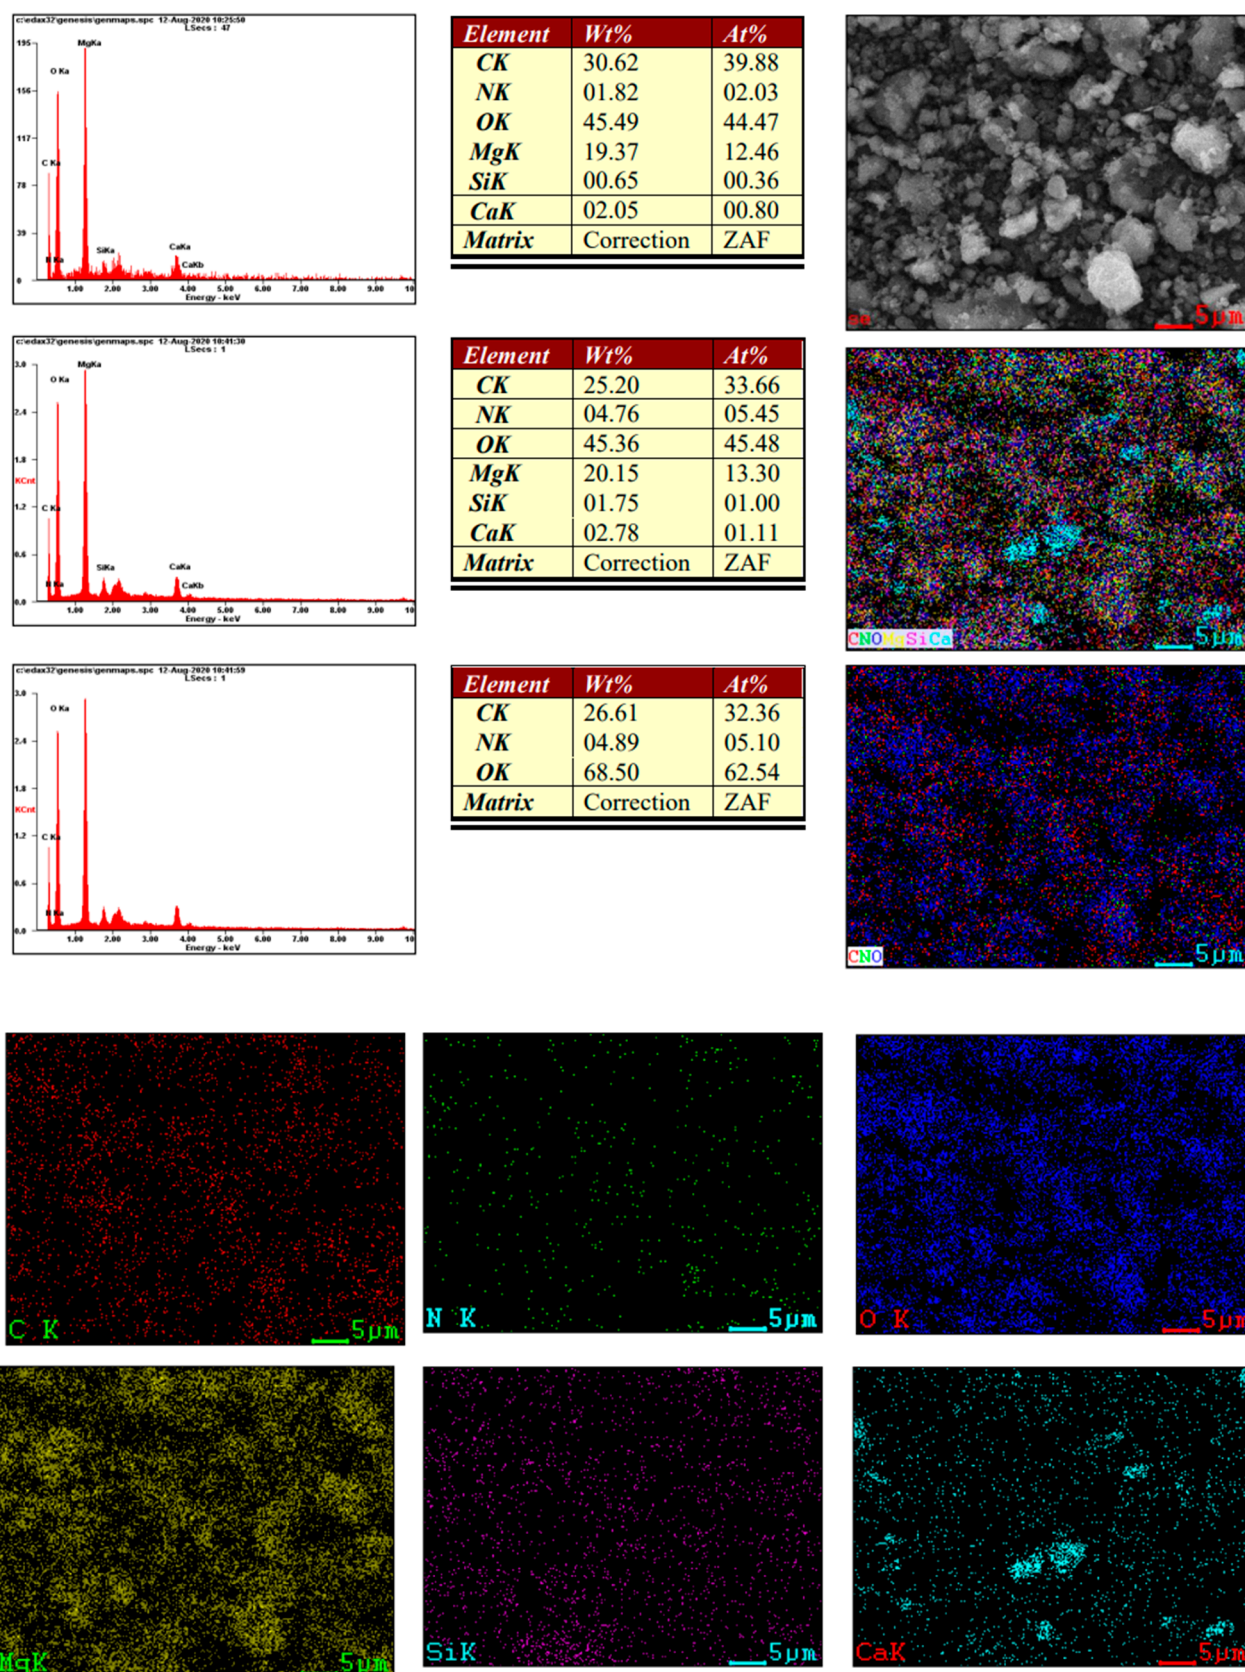

Figure S1: Element mapping by SEM/EDX of Tetra-Alg.

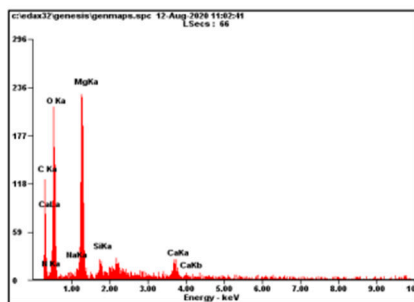

| Element       | Wt%        | At%   |
|---------------|------------|-------|
| <b>CK</b>     | 21.78      | 29.89 |
| <b>NK</b>     | 01.90      | 02.23 |
| <b>OK</b>     | 48.38      | 49.85 |
| <b>NaK</b>    | 00.55      | 00.40 |
| <b>MgK</b>    | 22.59      | 15.32 |
| <b>SiK</b>    | 01.91      | 01.12 |
| <b>CaK</b>    | 02.88      | 01.19 |
| <b>Matrix</b> | Correction | ZAF   |

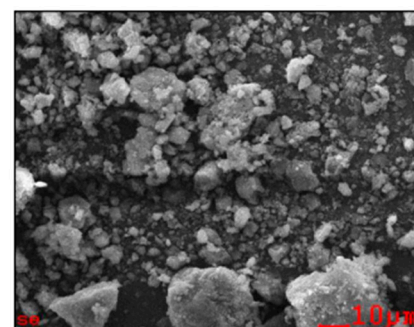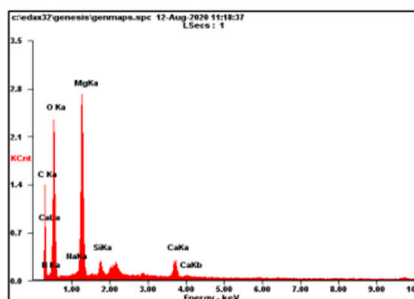

| Element       | Wt%        | At%   |
|---------------|------------|-------|
| <b>CK</b>     | 24.42      | 33.34 |
| <b>NK</b>     | 01.07      | 01.25 |
| <b>OK</b>     | 46.13      | 47.28 |
| <b>NaK</b>    | 01.05      | 00.75 |
| <b>MgK</b>    | 21.87      | 14.75 |
| <b>SiK</b>    | 02.22      | 01.30 |
| <b>CaK</b>    | 03.24      | 01.32 |
| <b>Matrix</b> | Correction | ZAF   |

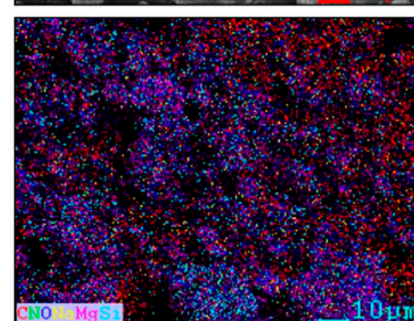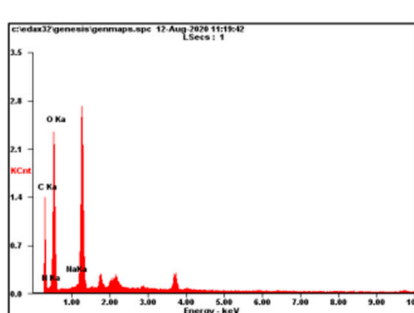

| Element       | Wt%        | At%   |
|---------------|------------|-------|
| <b>CK</b>     | 31.47      | 37.81 |
| <b>NK</b>     | 06.54      | 06.74 |
| <b>OK</b>     | 60.35      | 54.42 |
| <b>NaK</b>    | 01.64      | 01.03 |
| <b>Matrix</b> | Correction | ZAF   |

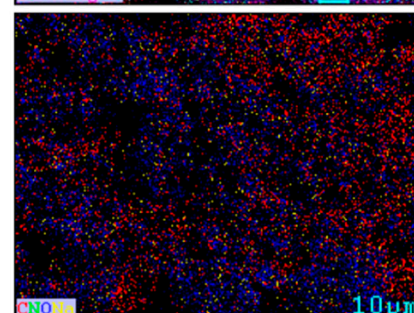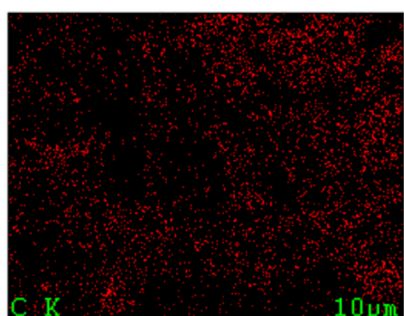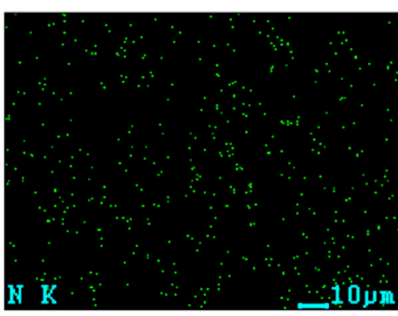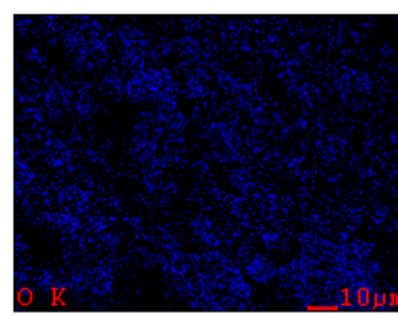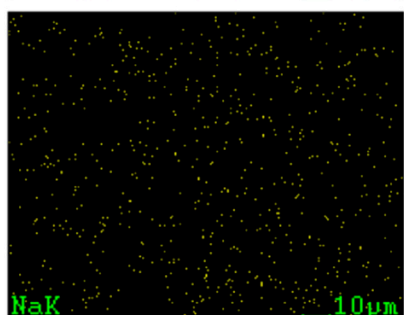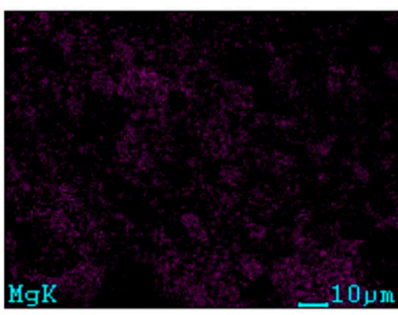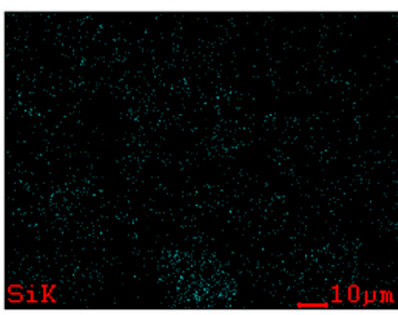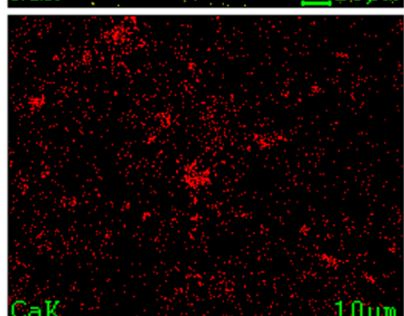

Figure S2: Element mapping by SEM/EDX of Tetra-Alg-Na



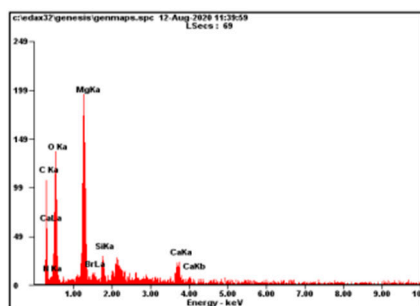

| Element | Wt%        | At%   |
|---------|------------|-------|
| CK      | 28.86      | 39.22 |
| NK      | 00.00      | 00.00 |
| OK      | 42.38      | 43.24 |
| MgK     | 21.69      | 14.56 |
| BrL     | 01.47      | 00.30 |
| SiK     | 02.29      | 01.33 |
| CaK     | 03.31      | 01.35 |
| Matrix  | Correction | ZAF   |

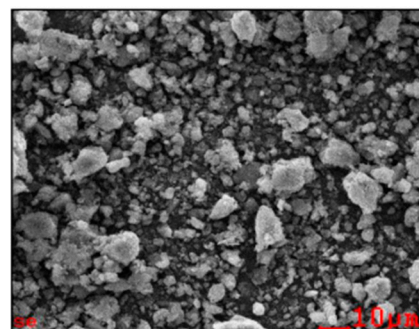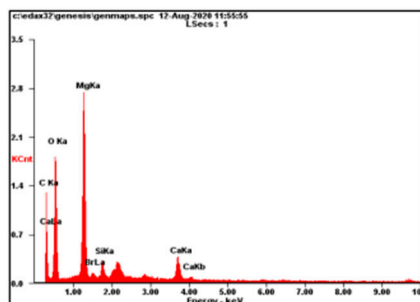

| Element | Wt%        | At%   |
|---------|------------|-------|
| CK      | 25.63      | 35.90 |
| OK      | 42.81      | 45.01 |
| MgK     | 22.05      | 15.26 |
| BrL     | 02.95      | 00.62 |
| SiK     | 02.58      | 01.54 |
| CaK     | 03.99      | 01.68 |
| Matrix  | Correction | ZAF   |

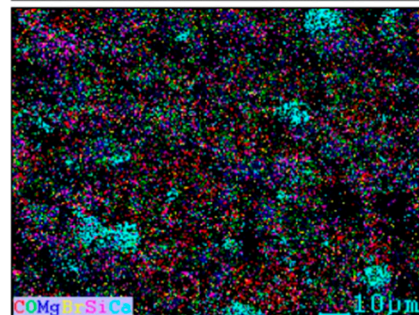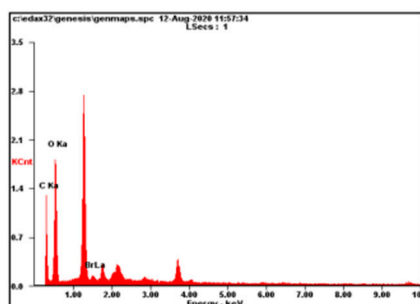

| Element | Wt%        | At%   |
|---------|------------|-------|
| CK      | 38.79      | 46.86 |
| OK      | 57.94      | 52.55 |
| BrL     | 03.26      | 00.59 |
| Matrix  | Correction | ZAF   |

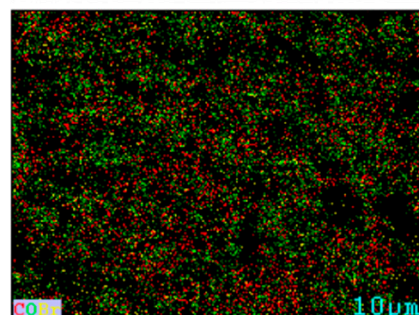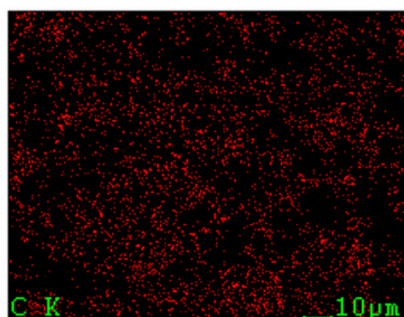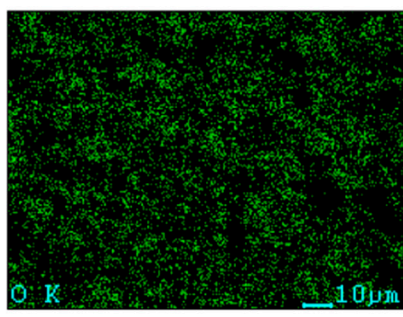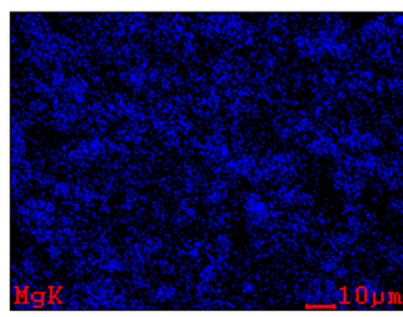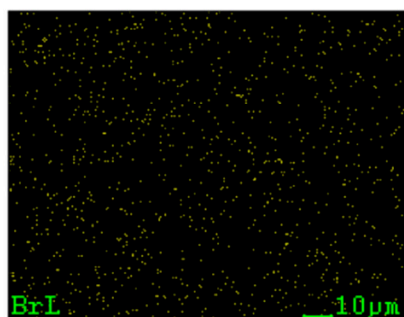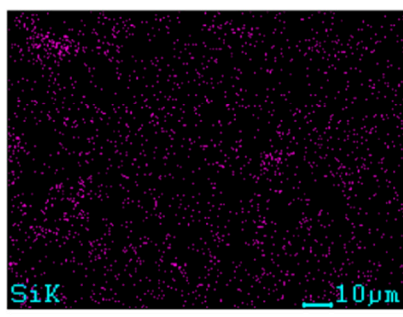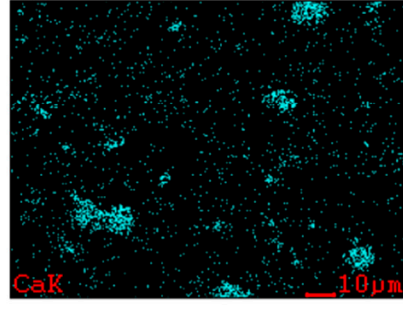

Figure S3: Element mapping by SEM/EDX of Tetra-Alg-CTAB.
